# Supplementary material for: Enhanced performance of polymer solar cells based on PTB7-Th:PC71BM by doping with 1-bromo-4-nitrobenzene
Source: Royal Society of Chemistry journal article supplement (doi:10.1039/c7tc04062h), 2017-01-01
Supplement: c7tc04062h1.pdf [file c7tc04062h1.pdf]

## Supporting Information

### Enhanced Performance of Polymer Solar Cells Based on PTB7-Th:PC<sub>71</sub>BM Doped with 1-Bromo-4-Nitrobenzene

Rui Fan, Zhaoxiang Huai, Yansheng Sun, Xiaowei Li, Guangsheng Fu \*, Shahua Huang, Lixin Wang \* and Shaopeng Yang \*

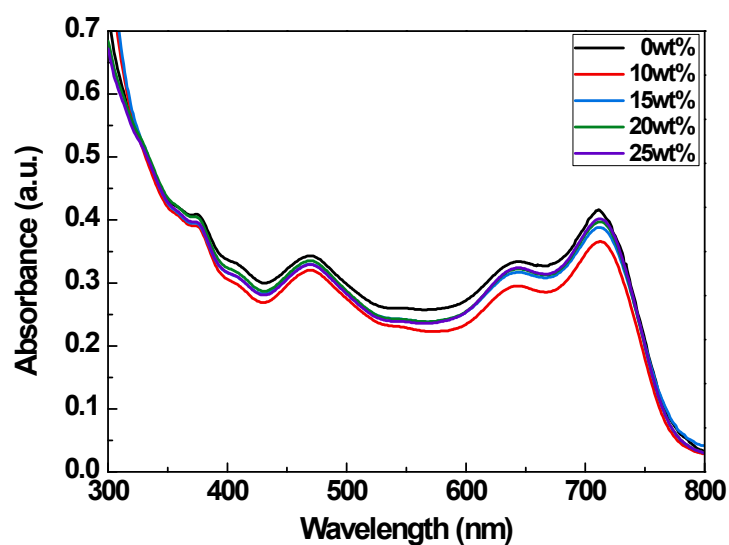

**Fig. S1.** Ultraviolet-visible absorption spectra of PTB7-Th:PC<sub>71</sub>BM with the different proportion of 1-bromo-4-nitrobenzene.

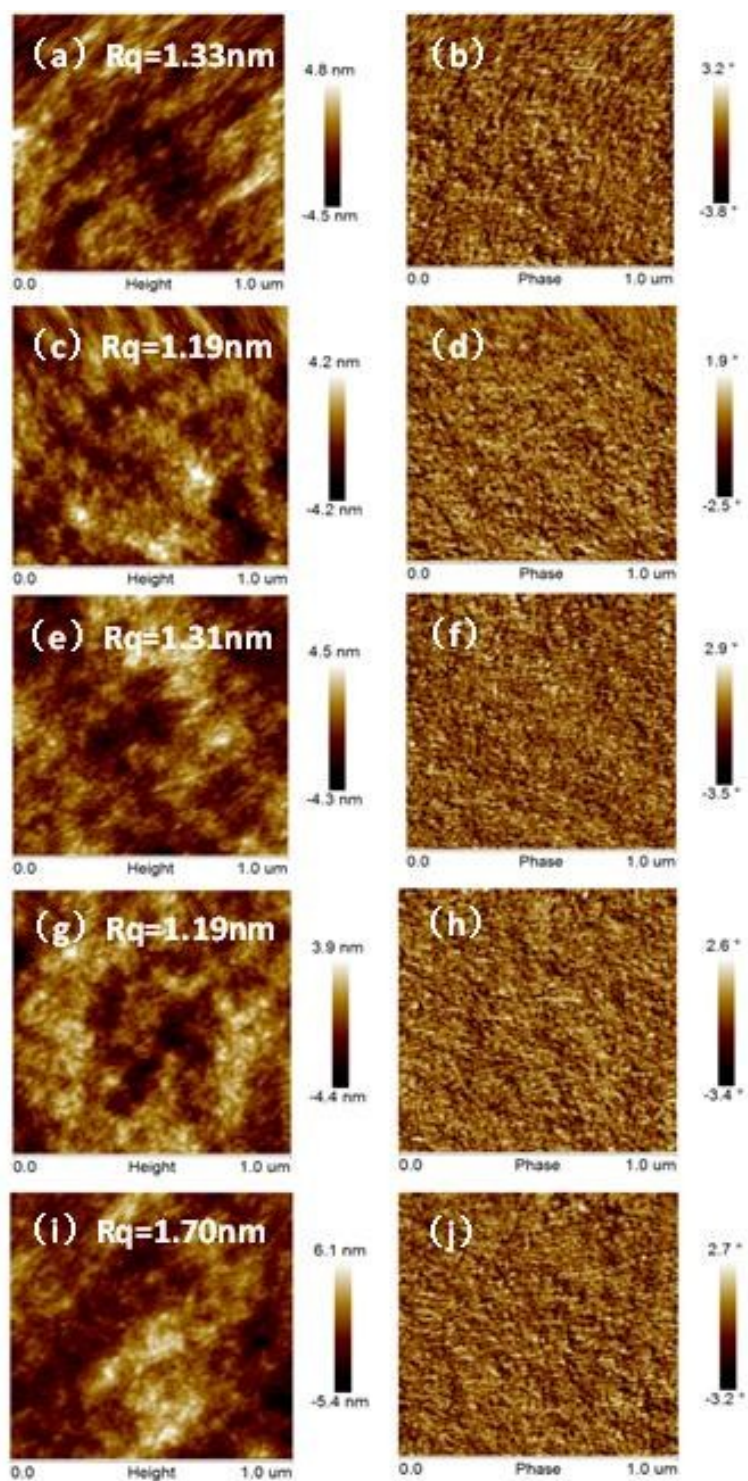

**Fig. S2.** AFM height images (left) and phase images (right) of films with addition of 1-bromo-4-nitrobenzene at mass ratios of 0wt%、10wt%、15wt%、20wt% and 25wt% showing a  $1\mu\text{m}\times 1\mu\text{m}$  surface area.
